# Supplementary material for: Cytotrophoblast induction of arterial apoptosis and lymphangiogenesis in an in vivo model of human placentation
Source: JCI journal article supplement (doi:10.1172/jci27306), 2006-10-02
Supplement: sd1 [file 1]

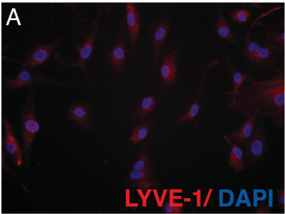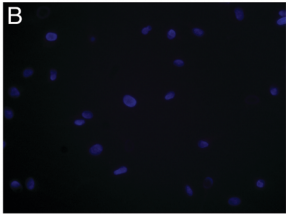

Supplementary figure. (A, B) Isolated primary lymphatic endothelial cells stained with an antibody that specifically reacts with LYVE-1 (A), but not with control rabbit IgG (B).
